# Supplementary material for: Multiplex Microarrays in 96-Well Plates Photoactivated with 4-Azidotetrafluorobenzaldehyde for the Identification and Quantification of β-Lactamase Genes and Their RNA Transcripts
Source: MDPI journal article supplement (doi:10.3390/cimb46010005), 2023-12-20
Supplement: s1 [file s1]

## Supplementary Materials

### Multiplex Microarrays in 96-Well Plates Photoactivated with 4-Azidotetrafluorobenzaldehyde for the Identification and Quantification of $\beta$ -Lactamase Genes and Their RNA Transcripts

Mariya M. Ulyashova, Galina V. Presnova, Anna A. Filippova, Vitaly G. Grigorenko, Alexey M. Egorov and Maya Yu. Rubtsova \*

Department of Chemistry, Lomonosov Moscow State University, 119991 Moscow, Russia;  
mmu@enzyme.chem.msu.ru (M.M.U.); gkovba@enzyme.msu.ru (G.V.P.);  
iiffii@mail.ru (A.A.F.); GrigorenkoVG@my.msu.ru (V.G.G.); aegorov@enz.chem.msu.ru (A.M.E.)

\* Correspondence: myr@enz.chem.msu.ru

Table S1. The results of genotyping DNA samples isolated from clinical bacterial strains on microarrays in the wells of the microtiter plate.

| BL type                                                        | Strain                                    | Microarray genotyping                            |
|----------------------------------------------------------------|-------------------------------------------|--------------------------------------------------|
| No BL genes detected<br>(N = 9)                                | <i>Escherichia coli</i><br>(N = 2)        | N/D                                              |
|                                                                | <i>Klebsiella pneumoniae</i><br>(N = 2)   | N/D                                              |
|                                                                | <i>Proteus mirabilis</i><br>(N = 1)       | N/D                                              |
|                                                                | <i>Acinetobacter baumannii</i><br>(N = 2) | N/D                                              |
|                                                                | <i>Pseudomonas aeruginosa</i><br>(N = 2)  | N/D                                              |
| Penicillinases<br>(N = 6)                                      | <i>Escherichia coli</i><br>(N = 2)        | TEM-1-like (N = 2)                               |
|                                                                | <i>Klebsiella pneumoniae</i><br>(N = 2)   | SHV-1-like (N = 2)                               |
|                                                                | <i>Serratia marcescens</i><br>(N = 2)     | TEM-1-like (N = 2)                               |
| ESBL(s) (including the presence of penicillinases)<br>(N = 38) | <i>Escherichia coli</i><br>(N = 10)       | TEM-1-like + SHV-5-like* (N = 2)                 |
|                                                                |                                           | CTX-M-1-like (N = 1)                             |
|                                                                |                                           | CTX-M-15-like* (N = 1)                           |
|                                                                |                                           | CTX-M-9-like (N = 1)                             |
|                                                                |                                           | TEM-1-like + CTX-M-15-like* (N = 2)              |
|                                                                |                                           | TEM-1-like + CTX-M-23-like* (N = 1)              |
|                                                                |                                           | TEM-1-like + CTX-M-9-like (N = 1)                |
|                                                                |                                           | SHV-5-like* + CTX-M-9-like (N = 1)               |
|                                                                | <i>Klebsiella pneumoniae</i><br>(N = 11)  | SHV-1-like + SHV-5-like* (N = 2)                 |
|                                                                |                                           | SHV-1-like + CTX-M-15-like* (N = 1)              |
|                                                                |                                           | TEM-1-like + SHV-1-like + SHV-2-like* (N = 1)    |
|                                                                |                                           | TEM-1-like + SHV-1-like + CTX-M-15-like* (N = 2) |
|                                                                |                                           | TEM-1-like + SHV-1-like + CTX-M-9-like           |

| BL type                                                                                                                                                                                                    | Strain                                    | Microarray genotyping                                          |
|------------------------------------------------------------------------------------------------------------------------------------------------------------------------------------------------------------|-------------------------------------------|----------------------------------------------------------------|
|                                                                                                                                                                                                            |                                           | (N = 1)                                                        |
|                                                                                                                                                                                                            |                                           | TEM-1-like + SHV-1-like + CTX-M-16-like* (N = 1)               |
|                                                                                                                                                                                                            |                                           | TEM-1-like + SHV-1-like+SHV-5-like* + CTX-M-1-like (N = 2)     |
|                                                                                                                                                                                                            |                                           | TEM-1-like + SHV-1-like+SHV-5-like* + CTX-M-2-like (N = 1)     |
|                                                                                                                                                                                                            | <i>Enterobacter cloacae</i><br>(N = 5)    | SHV-5-like* (N = 1)                                            |
|                                                                                                                                                                                                            |                                           | CTX-M-1-like (N = 1)                                           |
|                                                                                                                                                                                                            |                                           | TEM-1-like + CTX-M-1-like (N = 1)                              |
|                                                                                                                                                                                                            |                                           | TEM-1-like + CTX-M-15-like* (N = 1)                            |
|                                                                                                                                                                                                            |                                           | SHV-5-like + CTX-M-9-like (N = 1)                              |
|                                                                                                                                                                                                            | <i>Enterobacter aerogenes</i><br>(N = 1)  | TEM-1-like + CTX-M-1-like (N = 1)                              |
|                                                                                                                                                                                                            | <i>Citrobacter freundii</i><br>(N = 2)    | CTX-M-15-like* (N = 1)                                         |
|                                                                                                                                                                                                            |                                           | TEM-1-like + CTX-M-15-like* (N = 1)                            |
|                                                                                                                                                                                                            | <i>Proteus mirabilis</i><br>(N = 4)       | TEM-1-like + CTX-M-1-like (N = 1)                              |
|                                                                                                                                                                                                            |                                           | TEM-1-like + CTX-M-15-like* (N = 1)                            |
|                                                                                                                                                                                                            |                                           | TEM-1-like + SHV-2-like* + CTX-M-2-like (N = 2)                |
|                                                                                                                                                                                                            | <i>Providencia rettgeri</i><br>(N = 2)    | CTX-M-15-like (N = 1)                                          |
|                                                                                                                                                                                                            |                                           | TEM-1-like + CTX-M-15-like* (N = 1))                           |
|                                                                                                                                                                                                            | <i>Morganella morganii</i><br>(N = 1)     | CTX-M-15-like* (N = 1)                                         |
|                                                                                                                                                                                                            | <i>Salmonella infantis</i><br>(N = 1)     | TEM-1-like + CTX-M-15-like* (N = 1)                            |
|                                                                                                                                                                                                            | <i>Serratia marcescens</i><br>(N = 1)     | CTX-M-1-like                                                   |
| Carbapenemase(s)<br>(including the presence of penicillinases and ESBLs) (N = 12)                                                                                                                          | <i>Acinetobacter baumannii</i><br>(N = 5) | OXA-51-like + OXA-23-like (N = 1)                              |
|                                                                                                                                                                                                            |                                           | OXA-51-like + OXA-40-like (N = 2)                              |
|                                                                                                                                                                                                            |                                           | OXA-51-like + OXA-58-like (N = 2)                              |
|                                                                                                                                                                                                            | <i>Pseudomonas aeruginosa</i><br>(N = 4)  | VIM-like (N = 4)                                               |
|                                                                                                                                                                                                            | <i>Klebsiella pneumoniae</i><br>(N = 5)   | SHV-1-like + OXA-48-like (N = 1)                               |
|                                                                                                                                                                                                            |                                           | SHV-1-like + NDM-like (N = 1)                                  |
|                                                                                                                                                                                                            |                                           | TEM-1-like + SHV-1-like + OXA-23-like + KPC-like (N = 1)       |
|                                                                                                                                                                                                            |                                           | TEM-1-like + SHV-1-like + CTX-M-15-like* + NDM-like (N = 1)    |
|                                                                                                                                                                                                            |                                           | TEM-1-like + SHV-1-like + CTX-M-15-like* + OXA-48-like (N = 1) |
| *SHV-2-like (GE238/240SE substitution)<br>SHV-5-like (SHV_ID + GE238/240SK substitution)<br>CTX-M-15-like (D240G substitution)<br>CTX-M-23-like (P167T substitution)<br>CTX-M-16-like (D240G substitution) |                                           |                                                                |
